# Supplementary material for: Selective oxidation of 5-hydroxymethylfurfural to 2,5-furandicarboxylic acid over Au/CeO2 catalysts: the morphology effect of CeO2
Source: Royal Society of Chemistry journal article supplement (doi:10.1039/c9cy00211a), 2019-01-01
Supplement: c9cy00211a1.pdf [file c9cy00211a1.pdf]

## Support Information

### Selective oxidation of 5-hydroxymethylfurfural to 2,5-furandicarboxylic acid over Au/CeO<sub>2</sub> catalysts: the morphology effect of CeO<sub>2</sub>

Qingqing Li<sup>a,b,c,d</sup>, Haiyong Wang<sup>a,b,c,d</sup>, Zhipeng Tian<sup>a,b,c,d</sup>, Yujing Weng<sup>a,b,c,d</sup>,  
Chenguang Wang<sup>a,b,c</sup>, Jianru Ma<sup>e</sup>, Chaofeng Zhu<sup>e</sup>, Wenzhi Li<sup>\*e</sup>, Qiyong Liu<sup>\*a,b,c,f</sup> and  
Longlong Ma<sup>a,b,c</sup>

<sup>a</sup> Guangzhou Institute of Energy Conversion, Chinese Academy of Sciences, Guangzhou 510640, P. R. China

<sup>b</sup> CAS Key Laboratory of Renewable Energy, Guangzhou 510640, P. R. China

<sup>c</sup> Guangdong Key Laboratory of New and Renewable Energy Research and Development, Guangzhou 510640, P. R. China

<sup>d</sup> University of Chinese Academy of Sciences, Beijing 100049, P. R. China

<sup>e</sup> Laboratory of Basic Research in Biomass Conversion and Utilization, Department of Thermal Science and Energy Engineering, University of Science and Technology of China, Hefei 230026, PR China.

<sup>f</sup> Dalian National Laboratory for Clean Energy, Dalian 116023, PR China

\*E-mail: liuqy@ms.giec.ac.cn; liwenzhi@ustc.edu.cn

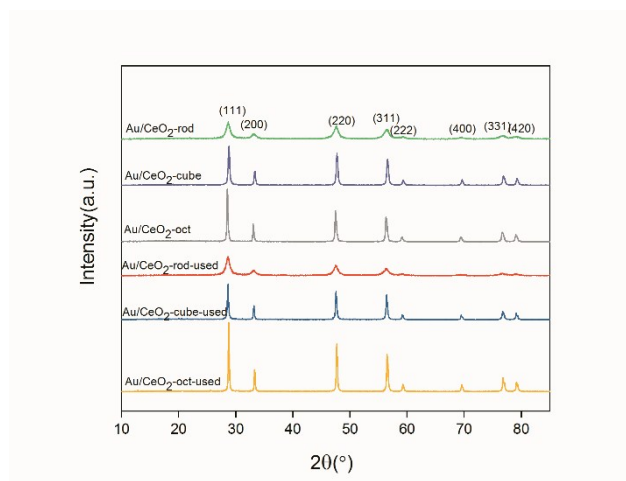

**Figure S1.** XRD patterns of the fresh and used Au/CeO<sub>2</sub> catalysts. Reaction conditions: 2.5 h, 130 °C, 0.5 MPa O<sub>2</sub>, molar ratio of NaOH/HMF = 4, molar ratio of HMF/Au = 400, 0.5 mmol HMF, 20 ml H<sub>2</sub>O.

### Au/CeO<sub>2</sub>-rod

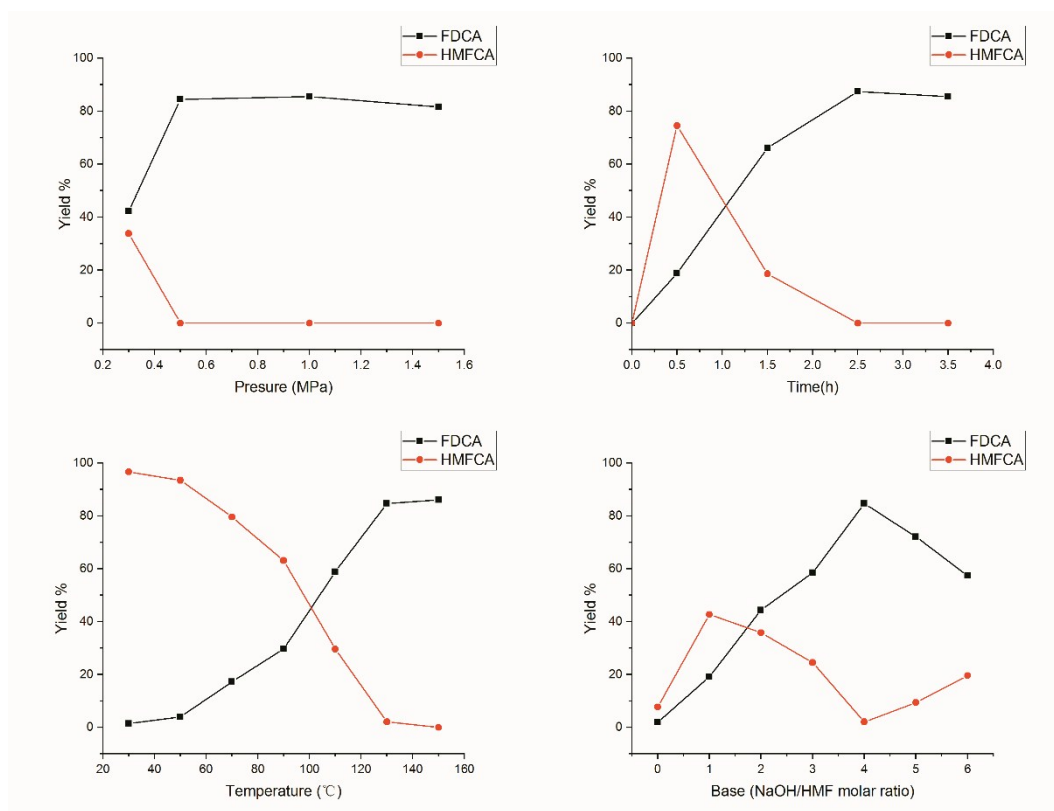

### Au/CeO<sub>2</sub>-cube

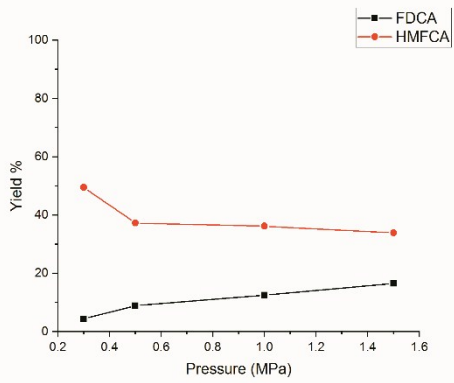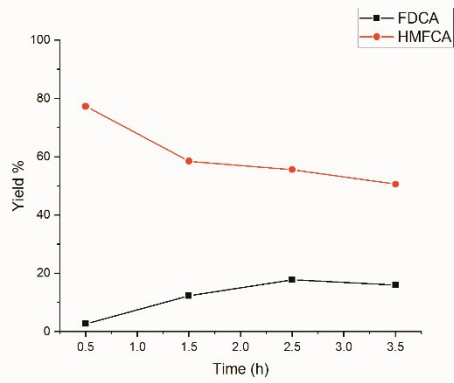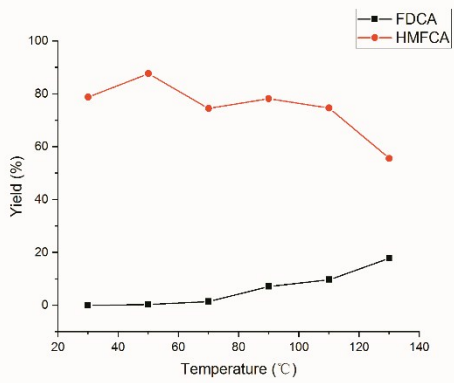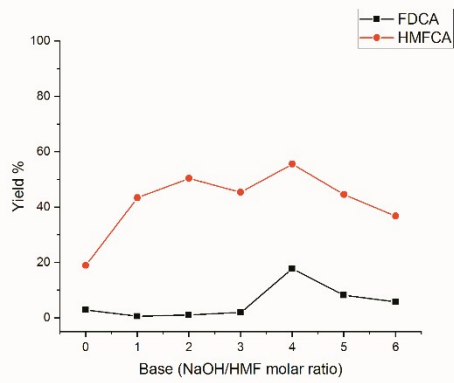

### Au/CeO<sub>2</sub>-oct

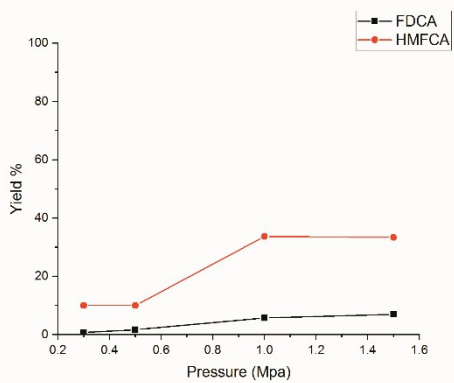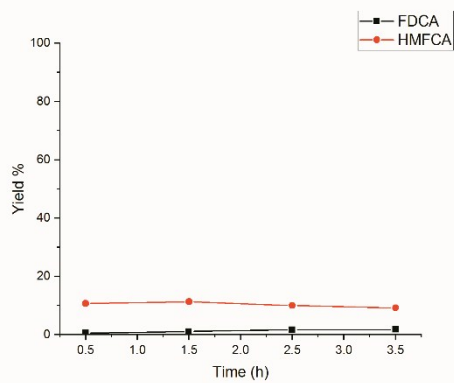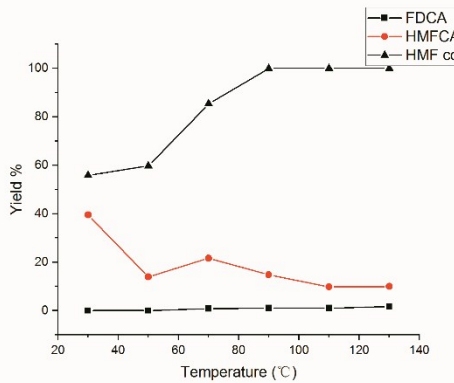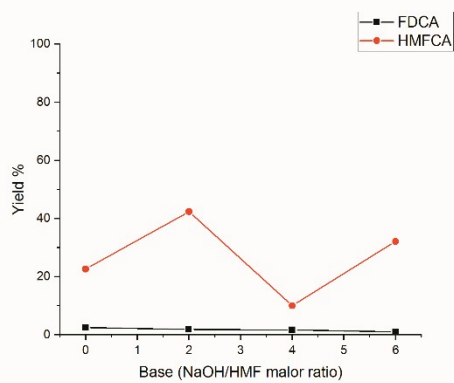

**Figure S2.** Effects of pressure, time, temperature and base on HMF oxidation over three catalysts. Reactions were performed under the conditions (2.5 h, 130 °C, 0.5 MPa O<sub>2</sub>, molar ratio of NaOH/HMF = 4, molar ratio of HMF/Au = 400, 0.5 mmol HMF, 20 ml H<sub>2</sub>O). If one parameter was studied while the others were kept the same.
